# Supplementary material
Source: PubMed Central journal article supplement (PMC2613858)
Supplement: NIHMS70172-supplement-supplement_1.pdf [file NIHMS70172-supplement-supplement_1.pdf]

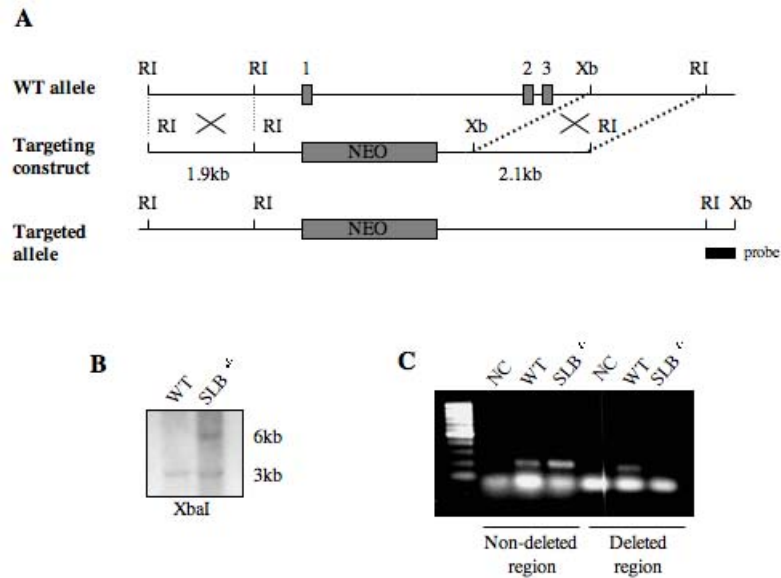

**Supplementary Fig. S1. Gene targeting at the *Slb* locus.** (A) Partial restriction map of the wild type *Slb* locus, the targeting vector and the disrupted *Slb* allele. The first three exons of the *Slb* gene and intervening intronic sequences are replaced with the *Neomycin* (*Neo*) cassette. (B) Southern blot analysis of XbaI digested genomic DNA isolated from wild type and targeted ES cells. The expected size of XbaI-generated fragments in the wild type (3 kb) and the disrupted allele (6 kb) is detected using a 3' external probe. The 3' probe corresponds to an EcoRI-XbaI genomic fragment (600 bp) adjacent to the right homologous arm of the construct. (C) RT-PCR analysis fails to detect *Slb* mRNA corresponding to the 5' deleted region. However, the targeted allele still expresses truncated mRNA corresponding to the 3' non-deleted region. RI, EcoRI, Xb, XbaI; NC, negative control.
